# Supplementary material
Source: PubMed Central journal article supplement (PMC8220924)

## Supplement

Table S1: Detailed SPT results of the fungi investigated from 1998 to 2017 in 5-year intervals. Total patient numbers of each tested allergen as well as total and relative patients with positive SPT are listed.

| <b>1998 – 2002</b> |                            |                         |                         |
|--------------------|----------------------------|-------------------------|-------------------------|
| <b>Allergen</b>    | <b>All tested patients</b> | <b>n [positive SPT]</b> | <b>% [positive SPT]</b> |
| Alternaria         | 1327                       | 103                     | 7.8                     |
| Aspergillus        | 1464                       | 84                      | 5.7                     |
| Aureobasidium      | 399                        | 46                      | 11.5                    |
| Botrytis           | 399                        | 36                      | 9.0                     |
| Cladosporium       | 1017                       | 77                      | 7.6                     |
| Curvularia         | 399                        | 27                      | 6.8                     |
| Fusarium           | 399                        | 22                      | 5.5                     |
| Helminthosporium   | 399                        | 40                      | 10.0                    |
| Mucor              | 400                        | 32                      | 8.0                     |
| Penicillium        | 400                        | 50                      | 12.5                    |
| Rhizopus           | 399                        | 24                      | 6.0                     |
| Serpula            | 399                        | 29                      | 7.3                     |
| <b>2003 – 2007</b> |                            |                         |                         |
| Alternaria         | 538                        | 56                      | 10.4                    |
| Aspergillus        | 554                        | 60                      | 10.8                    |
| Aureobasidium      | 171                        | 16                      | 9.4                     |
| Botrytis           | 171                        | 24                      | 14.0                    |
| Cladosporium       | 403                        | 39                      | 9.7                     |
| Curvularia         | 171                        | 22                      | 12.9                    |
| Fusarium           | 171                        | 14                      | 8.2                     |
| Helminthosporium   | 171                        | 14                      | 8.2                     |
| Mucor              | 171                        | 11                      | 6.4                     |
| Penicillium        | 172                        | 22                      | 12.8                    |
| Rhizopus           | 171                        | 14                      | 8.2                     |
| Serpula            | 171                        | 9                       | 5.3                     |
| <b>2008 – 2012</b> |                            |                         |                         |
| Alternaria         | 632                        | 79                      | 12.5                    |
| Aspergillus        | 643                        | 84                      | 13.1                    |
| Aureobasidium      | 178                        | 28                      | 15.7                    |
| Botrytis           | 178                        | 24                      | 13.5                    |
| Cladosporium       | 481                        | 56                      | 11.6                    |
| Curvularia         | 178                        | 36                      | 20.2                    |
| Fusarium           | 178                        | 12                      | 6.7                     |
| Helminthosporium   | 178                        | 27                      | 15.2                    |
| Mucor              | 178                        | 17                      | 9.6                     |
| Penicillium        | 178                        | 24                      | 13.5                    |

|                    |     |    |      |
|--------------------|-----|----|------|
| Rhizopus           | 178 | 21 | 11.8 |
| Serpula            | 178 | 16 | 9.0  |
| <b>2013 – 2017</b> |     |    |      |
| Alternaria         | 712 | 77 | 10.8 |
| Aspergillus        | 720 | 56 | 7.8  |
| Aureobasidium      | 127 | 19 | 15.0 |
| Botrytis           | 129 | 12 | 9.3  |
| Cladosporium       | 565 | 49 | 8.7  |
| Curvularia         | 93  | 19 | 20.4 |
| Fusarium           | 129 | 10 | 7.8  |
| Helminthosporium   | 128 | 15 | 11.7 |
| Mucor              | 116 | 12 | 10.3 |
| Penicillium        | 130 | 35 | 26.9 |
| Rhizopus           | 129 | 11 | 8.5  |
| Serpula            | 128 | 12 | 9.4  |

Figure S1: Modified cladogram of fungi. Depicted are all investigated fungi in this study. This classification is based on the latest recommendations of the WHO/IUIS Allergen Nomenclature Sub-committee (<http://allergen.org>, last accessed on: May 19<sup>th</sup> 2020).

Fungal genera with close relationships are highlighted.

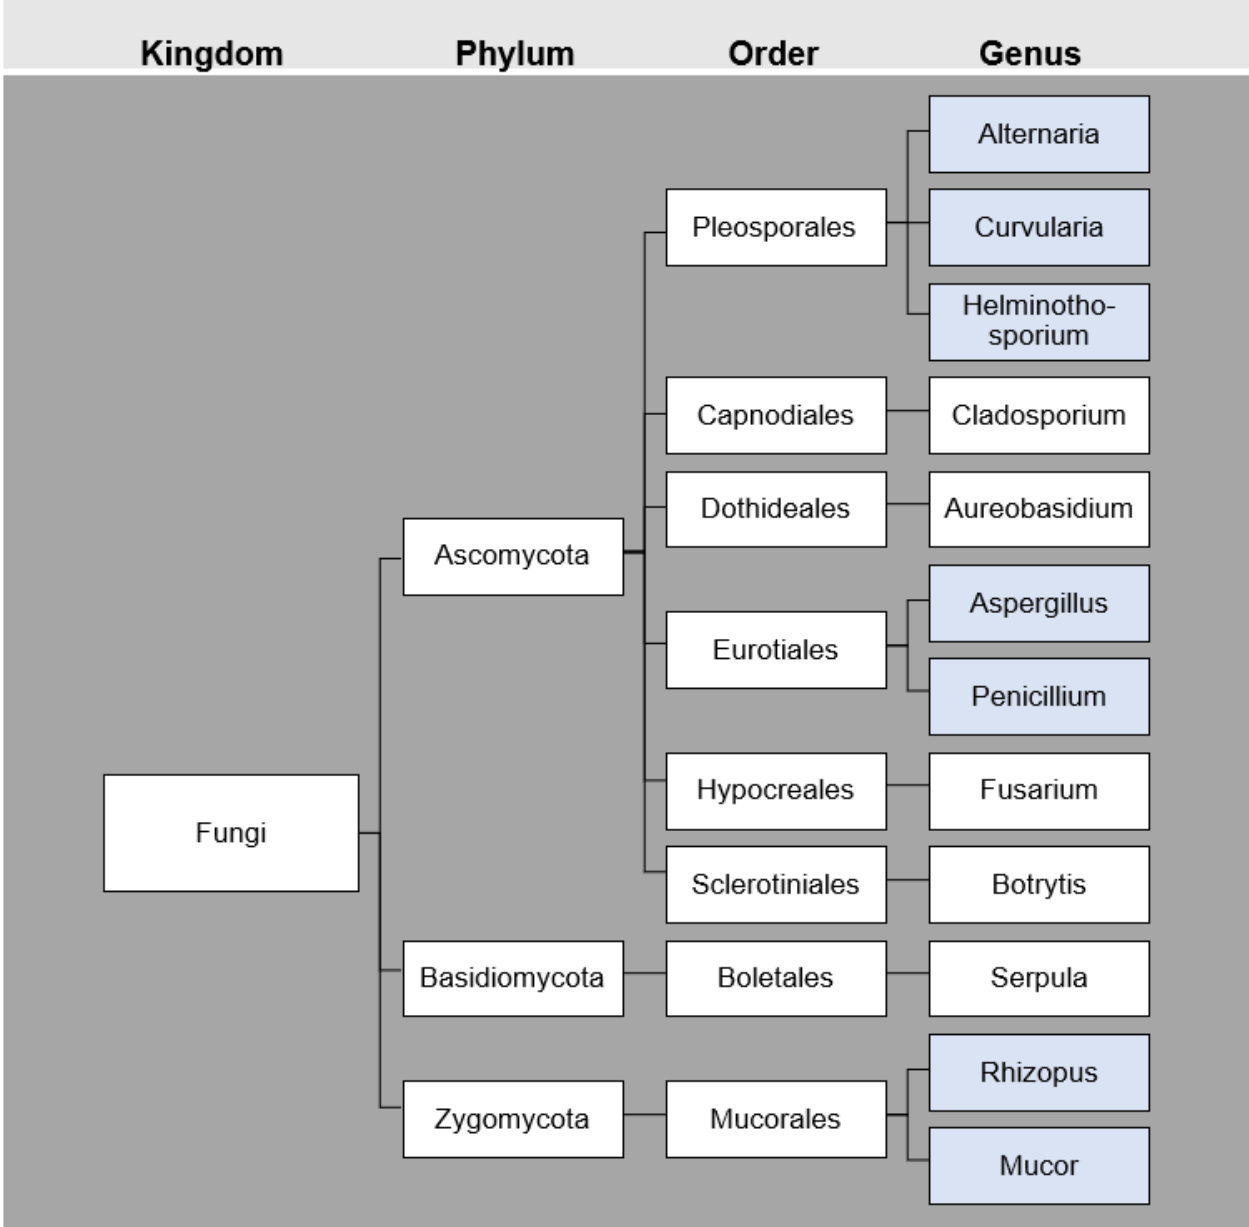

Figure S2: Distribution of gender (left) and age (right) of all tested patients (n=3358).

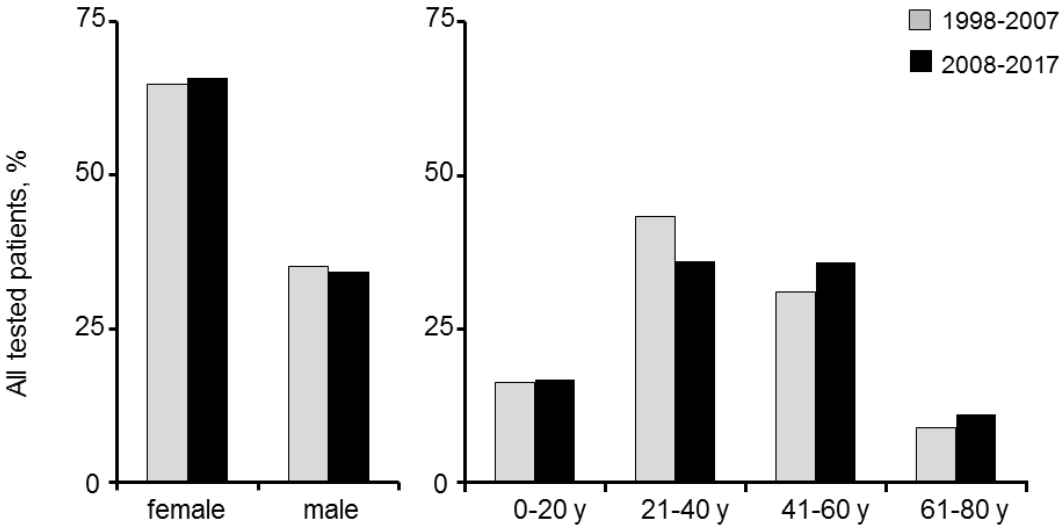

Supplement: iaa-0182-0515-s01.pdf [file iaa-0182-0515-s01.pdf]
